TITLE : PHARMACOKINETICS OF MORPHINE IN NORMAL AND CIRRHOTIC SUBJECTS.

AUTHORS : J.X. MAZOIT, M.D., P. SANDOUK, Ph. D., P. ZETLAOUI, M.D., AND J.M. SCHERMANN, Ph. D.

AFFILIATION : Département d'Anesthésiologie - Université Paris-Sud, hôpital de Bicêtre - 94270 Le Kremlin-Bicêtre and INSERM U26 - Hôpital Fernand Widal - 75010 Paris - FRANCE.

**INTRODUCTION.** Cirrhosis of the liver usually decreases the rate of elimination of drugs which are actively metabolized by the liver. Morphine (M) is assumed to have a prolonged elimination half-life ( $t_{1/2\beta}$ ) in cirrhotic (Ci) patients when compared with normal (N) subjects (1). Surprisingly, Patwardhan et al (2) did not find any difference in M kinetics between N and Ci. Therefore, we used a highly specific radioimmunoassay in order to compare M kinetics in N and Ci subjects.

**METHODS.** After institutional approval, informed consent was given by 5 N subjects, aged (mean  $\pm$  SD)  $60 \pm 8$  years and weighing  $65 \pm 21$  kg, and 7 alcoholic Ci patients aged  $64 \pm 6$  years and weighing  $71 \pm 14$  kg. Neither surgical portocaval shunt or clinical evidence of ascites was found in any. All had normal renal function. Major biochemical data (prothrombin time (PT), serum albumin (SA) and serum bilirubin (SBI)) levels are reported in table 1. All subjects received a single IV bolus of M hydrochloride ( $0.1 \text{ mg/kg} = 0.076 \text{ mg/kg M base}$ ). Peripheral venous samples were collected at frequent intervals from 2 min to 36 hours after injection. Dosage of unchanged M (M unc) in plasma was determined using a highly radioimmunoassay with a sensitivity of  $0.2 \text{ ng/ml}$ . Dosage of total M in plasma was determined using a standard radioimmunoassay (Abuscreen\*). M metabolites (M met) were calculated (total M - M unc). Pharmacokinetic analysis was performed using a non-linear least-squares regression program. The following parameters were calculated : Terminal half-life ( $t_{1/2\beta}$ ), apparent volume of distribution ( $Vd\beta$ ), total body clearance (Cl<sub>t</sub>), invasion half-life ( $t_{1/2\alpha}$ ). Statistical analysis was performed using the non-parametric Mann-Witney U-test.

**RESULTS.** The prolonged  $t_{1/2\beta}$  of free M in Ci patients was associated with a decreased Cl<sub>t</sub>.  $Vd\beta$  was similar in both groups. There was a prolonged  $t_{1/2\alpha}$  and a shorter  $t_{1/2\beta}$  of Mmet in the Ci group (table 2). A second peak of Mmet was observed in both groups (fig. 1).

#### DISCUSSION.

**Unchanged M kinetics :** Elimination of unchanged M is longer in Ci than in N subjects. The main cause of this prolonged  $t_{1/2\beta}$  is a slower Cl<sub>t</sub>. Decrease in protein binding (increase in free fraction) due to the lower SA and higher SBI levels may occur in Ci patients (1). Nevertheless, in our study (patients without ascites)  $Vd\beta$  does not significantly differ in the two groups.

**Kinetics of M Metabolites :** Production of metabolites (even actives (3)) did decrease in Ci patients, whereas elimination was shorter. This may be due to the lower SA and higher SBI levels in these Ci patients with normal renal function. The concentration-time curves show a second peak which may be due to late production of some metabolites and/or enterohepatic recirculation (4).

TABLE 1. Major biochemical data (mean  $\pm$  SD)

|    | PT<br>(per cent of normal) | SA<br>(mmol/l)             | SBI<br>( $\mu\text{mol/l}$ ) |
|----|----------------------------|----------------------------|------------------------------|
| N  | 100 per cent               | $491 \pm 38$               | $6 \pm 2.3$                  |
| Ci | $52 \pm 10$ per cent       | $343 \pm 56$<br>$p < 0.01$ | $45 \pm 24$<br>$p < 0.01$    |

TABLE 2. Pharmacokinetic parameters (mean  $\pm$  SD)

|                                                              | N              | Ci             |            |
|--------------------------------------------------------------|----------------|----------------|------------|
| M unc<br>$t_{1/2\beta}$<br>(min)                             | $104 \pm 44$   | $168 \pm 39$   | $p < 0.05$ |
| $Vd\beta$<br>(l.kg <sup>-1</sup> )                           | $5.18 \pm 1.9$ | $4.58 \pm 0.9$ | NS         |
| Cl <sub>t</sub><br>(ml.min <sup>-1</sup> .kg <sup>-1</sup> ) | $36 \pm 18$    | $19.5 \pm 4.0$ | $p < 0.01$ |
| M met<br>$t_{1/2\alpha}$<br>(min)                            | $6.05 \pm 1.7$ | $24 \pm 19$    | $p < 0.01$ |
| $t_{1/2\beta}$<br>(min)                                      | $808 \pm 228$  | $166 \pm 69$   | $p < 0.01$ |

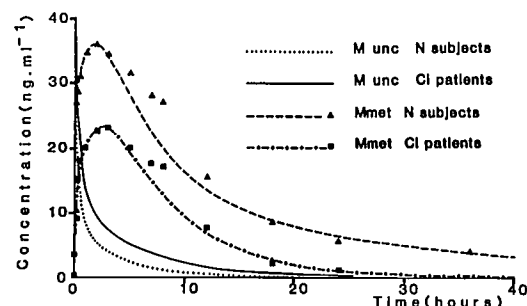

Fig. 1. Plasma levels of unchanged morphine and of metabolites. Curves were fitted to the mean data points for all patients in each group.

#### REFERENCES

1. OLSEN GD, BENNET WM, PORTER GA : Morphine and phenytoin binding to plasma proteins in renal and hepatic failure. Clin. Pharmacol. Ther. 17 : 677-684, 1975.
2. PATWARDHAN RV, JOHNSON RF, HOYUMPA AJr : Normal metabolism of morphine in cirrhosis. Gastroenterology 81 : 1006-1001, 1981.
3. YEH SY, KREBS HA, GORODETZKY CW : Isolation and identification of morphine N-oxide  $\alpha$ - and  $\beta$ -Dihydro-morphines,  $\beta$ - or  $\gamma$ -Isomorphine, and hydroxylated morphine as morphine metabolites in several mammalian species. J. of Pharm. Sci. 68 : 133-140, 1979.
4. GARRETT ER, JACKSON AJ : Pharmacokinetics of morphine and its Surrogates III : Morphine and morphine 3-Monoglucuronide pharmacokinetics in the dog as a function of dose. J. Pharm. Sc. 68 : 753-771, 1979.
